# Supplementary material for: Identification of the hub gene BUB1B in hepatocellular carcinoma via bioinformatic analysis and in vitro experiments
Source: PeerJ. 2021 Feb 23;9:e10943. doi: 10.7717/peerj.10943 (PMC7908873; doi:10.7717/peerj.10943)
Supplement: Supplemental Information 1 [file peerj-09-10943-s001.xlsx]

## Sheet: Figure9-A
	2^-ΔΔCT
LO2	0.835088	0.952638	1.25701
G2	2.26577	2	2.34567
H7	1.51572	1.59107	1.52626

## Sheet: Figure9-B
		2^-ΔΔCT
HepG2	NC	0.981686	0.988514	1.03049
	si-1	0.448548	0.448548	0.461158
	si-2	0.387786	0.575678	0.540862
	si-3	0.791869	0.770215	0.652176
Huh7	NC	1.21982	0.92445	0.886791
	si-1	0.425334	0.437291	0.313528
	si-2	0.523647	0.491978	0.502316
	si-3	0.509328	0.498846	0.622725

## Sheet: Figure9-C
		Absorbance (450nm)
HepG2	Days	si-NC			si-1			si-2
	0	0.2444	0.2501	0.2351	0.2415	0.2521	0.2378	0.2431	0.2499	0.2332
	1	0.5114	0.7065	0.6016	0.4928	0.4251	0.5929	0.4145	0.5203	0.5977
	2	1.0631	1.2151	1.0918	0.6729	0.7981	0.8351	0.7101	0.8121	0.9099
	3	1.4216	1.5712	1.4703	0.9915	1.2101	1.2313	1.0015	1.1871	1.1912
Huh7	Days	si-NC			si-1			si-2
	0	0.2261	0.2235	0.2231	0.2301	0.2402	0.2219	0.2297	0.2361	0.2312
	1	0.4491	0.6299	0.6321	0.4349	0.5711	0.3731	0.5411	0.4239	0.3851
	2	0.9112	1.1519	1.1062	0.8015	0.9013	0.6235	0.8821	0.7058	0.6411
	3	1.2805	1.4973	1.4512	1.1011	1.1913	0.9001	1.2119	1.1112	0.9133

## Sheet: Figure9-D
		cell number
		NC	si-1	si-2
	HepG2	685	435	411
		780	401	392
		719	473	445
	Huh7	533	243	225
		439	220	202
		515	295	231

## Sheet: Figure9-E F
		cell number
		NC	si-1	si-2
HepG2	migration	189	103	83
		199	111	101
		233	110	110
	invasion	141	77	79
		157	71	61
		143	83	48
Huh7	migration	143	81	59
		131	78	80
		155	66	57
	invasion	41	18	31
		48	14	26
		60	33	24

## Sheet: Figure9-G H
cell cycle			NC			si-1			si-2
	HepG2	G0/G1	27.89	29.09	29.28	35.06	35.15	35.67	36.22	36.52	38.4
		S+G2	72.11	70.91	70.72	64.94	64.85	64.33	63.78	63.48	61.6
			NC			si-1			si-2
	Huh7	G0/G1	29.73	30.59	32.8	38.59	39.21	39.35	39.88	40	41.28
		S+G2	70.27	69.41	67.2	61.41	60.79	60.65	60.12	60	58.72
apoptosis		NC	si-1	si-2
	HepG2	6.8	10	12.38
		6.84	12.24	13.02
		7.84	12.8	13.09
	Huh7	7.51	12.58	14.63
		7.51	13.6	14.97
		7.67	13.79	15.28
