# Supplementary material for: Identification of the hub gene BUB1B in hepatocellular carcinoma via bioinformatic analysis and in vitro experiments
Source: PeerJ. 2021 Feb 23;9:e10943. doi: 10.7717/peerj.10943 (PMC7908873; doi:10.7717/peerj.10943)
Supplement: Supplemental Information 2 [file peerj-09-10943-s002.xlsx]

## Sheet: Figure10-A
		ATP content (nM/mL)			Protein concentration (mg/mL)			ATP content (nM/mg)
		NC	si-1	si-2	NC	si-1	si-2	NC	si-1	si-2
	HepG2	6.1512	2.5612	2.1623	1.0085	1.0003	1.1119	6.09936	2.56043	1.94469
		7.3221	3.0013	3.1135	1.2313	1.2513	1.1913	5.94664	2.39855	2.61353
		7.0113	2.2614	2.0019	1.2512	1.1617	1.1216	5.60366	1.94663	1.78486
	Huh7	7.1151	2.5146	2.1128	1.1124	1.0045	0.9998	6.39617	2.50333	2.11322
		6.5123	2.6634	2.5334	0.9814	1.0913	1.1019	6.63572	2.44058	2.29912
		7.0512	1.9916	1.6812	1.0841	0.9926	0.8815	6.5042	2.00645	1.9072

## Sheet: Figure10-C
	OCR (pMoles/min):				protein content (ug)				pMoles/min/ug protein
	NC	si-1	si-2		NC	si-1	si-2		NC	si-1	si-2
HepG2	289.472	78.5605	117.895		13.213	7.331	8.531		21.9081	10.7162	13.8196
	276.879	90.1378	132.228		13.553	7.433	8.812		20.4293	12.1267	15.0054
	236.115	105.35	106.106		12.292	8.939	7.882		19.2089	11.7854	13.4618
Huh7	282.062	78.4007	100.958		13.491	7.691	8.191		20.9075	10.1938	12.3255
	275.545	87.9236	149.87		13.961	8.013	9.638		19.7367	10.9726	15.5499
	291.64	94.1543	105.308		11.715	8.184	7.991		24.8946	11.5047	13.1783
