# Supplementary material for: Identification of the hub gene BUB1B in hepatocellular carcinoma via bioinformatic analysis and in vitro experiments
Source: PeerJ. 2021 Feb 23;9:e10943. doi: 10.7717/peerj.10943 (PMC7908873; doi:10.7717/peerj.10943)
Supplement: Supplemental Information 5 [file peerj-09-10943-s005.xlsx]

## Sheet: S. Figure 1-A
		2^-ΔΔCT
HepG2	NC	0.943874	0.97041	1.09177
	OE	5.45155	4.8121	4.61608
Huh7	NC	0.97942	1.00696	1.01396
	OE	2.14355	2.09943	1.67018

## Sheet: S. Figure 1-B
		Absorbance (450nm)
HepG2	Days	NC			OE
	0	0.2603	0.2522	0.2466	0.2433	0.2701	0.2379
	1	0.5358	0.6311	0.4953	0.6911	0.5488	0.7322
	2	1.0127	0.9623	1.1065	1.1627	1.3123	1.2152
	3	1.5087	1.4533	1.5584	1.6723	1.7256	1.6424
Huh7	Days	NC			OE
	0	0.2321	0.2466	0.2315	0.2831	0.2675	0.2467
	1	0.4929	0.6155	0.5651	0.5915	0.7323	0.6619
	2	1.1618	1.1036	1.2256	1.3155	1.3012	1.2633
	3	1.6055	1.5978	1.6533	1.8354	1.7763	1.7313

## Sheet: S. Figure 1-C
		cell number
		NC	OE
	HepG2	721	1121
		665	1025
		693	1153
	Huh7	414	653
		435	667
		491	724

## Sheet: S. Figure 1-D  E
		cell number
		NC	OE
HepG2	migration	173	253
		166	283
		159	266
	invasion	133	169
		112	182
		124	194
Huh7	migration	105	165
		112	173
		121	144
	invasion	38	91
		27	86
		43	69

## Sheet: S. Figure 1-F  G
cell cycle			NC			OE
	HepG2	G0/G1	59.51	58.08	58.39	53.31	54.36	51.38
		S+G2	40.5	41.91	41.61	46.69	45.63	48.62
			NC			OE
	Huh7	G0/G1	59.36	58.87	58.58	51.35	50.92	50.78
		S+G2	40.64	41.13	41.42	48.65	49.08	49.23
apoptosis		NC	OE
	HepG2	8.5	2.34
		8.54	2.57
		8.84	2.59
	Huh7	9.28	4.21
		9.49	4.93
		9.79	5.01
