# Supplementary material for: Identification of the hub gene BUB1B in hepatocellular carcinoma via bioinformatic analysis and in vitro experiments
Source: PeerJ. 2021 Feb 23;9:e10943. doi: 10.7717/peerj.10943 (PMC7908873; doi:10.7717/peerj.10943)
Supplement: Supplemental Information 6 [file peerj-09-10943-s006.xlsx]

## Sheet: Supporting. Figure 2-A
		ATP content (nM/mL)		Protein concentration (mg/mL)		ATP content (nM/mg)
		NC	OE	NC	OE	NC	OE
	HepG2	5.3358	8.5837	0.9412	1.1135	5.66915	7.70876
		6.1187	9.6055	1.0352	1.0923	5.91065	8.79383
		6.9235	10.4421	1.1149	1.2157	6.20997	8.58937
	Huh7	8.2257	11.2432	1.4211	1.4012	5.78826	8.02398
		9.0231	12.3357	1.5132	1.4525	5.96293	8.49274
		7.9964	13.1536	1.3291	1.2959	6.0164	10.1502

## Sheet: Supporting. Figure 2-C
	OCR (pMoles/min)			protein content (ug)			pMoles/min/ug protein
	NC	OE		NC	OE		NC	OE
HepG2	471.035	459.182		23.672	18.331		19.8984	25.0495
	497.569	485.159		24.155	18.725		20.599	25.9097
	446.828	452.646		20.553	19.225		21.7403	23.5447
Huh7	406.827	407.806		19.633	16.482		20.7216	24.7425
	405.863	403.444		20.372	17.033		19.9226	23.686
	421.306	416.63		22.445	16.455		18.7706	25.3194
